# Supplementary material
Source: MDPI journal article supplement (https://www.mdpi.com/2073-4344/8/12/580)
Supplement: s1 [file s1]

## Supplementary information

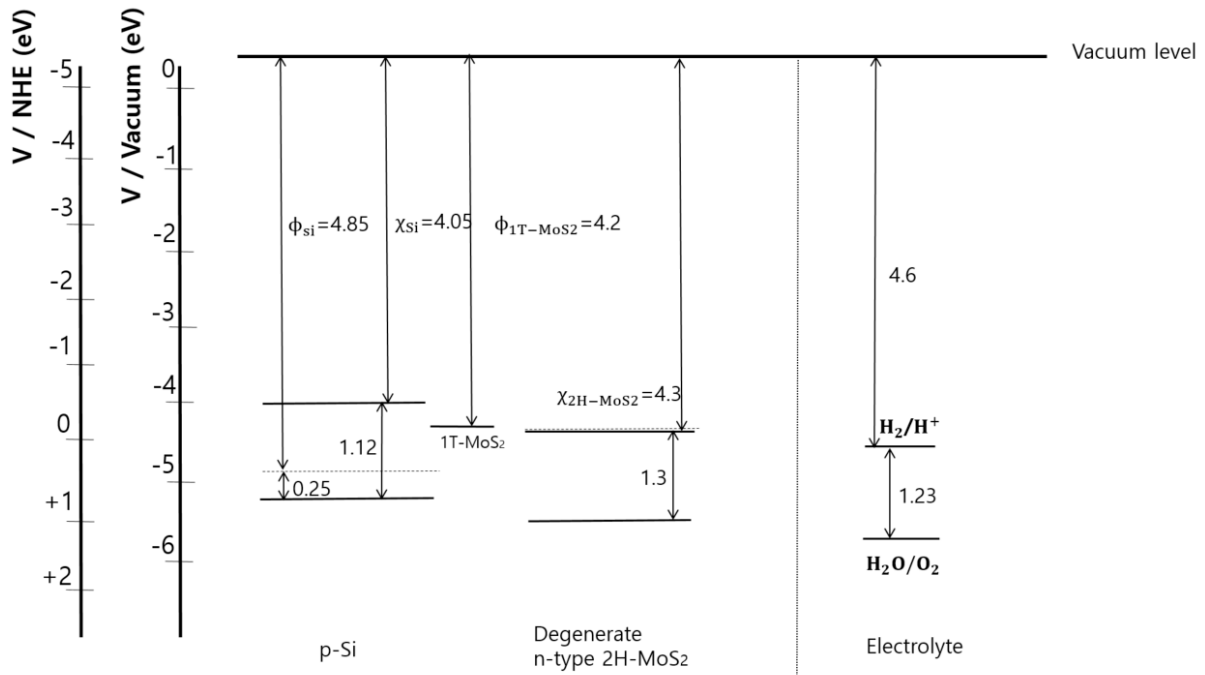

**Figure S1.** Schematic energy level diagram of the band alignment at *p*-Si/MoS<sub>2</sub> interface in terms of vacuum level and normal hydrogen electrode level in electrolyte of pH = 0.3. The *p*-Si doping level is  $\sim 1.6 \times 10^{15} \text{ cm}^{-3}$ .

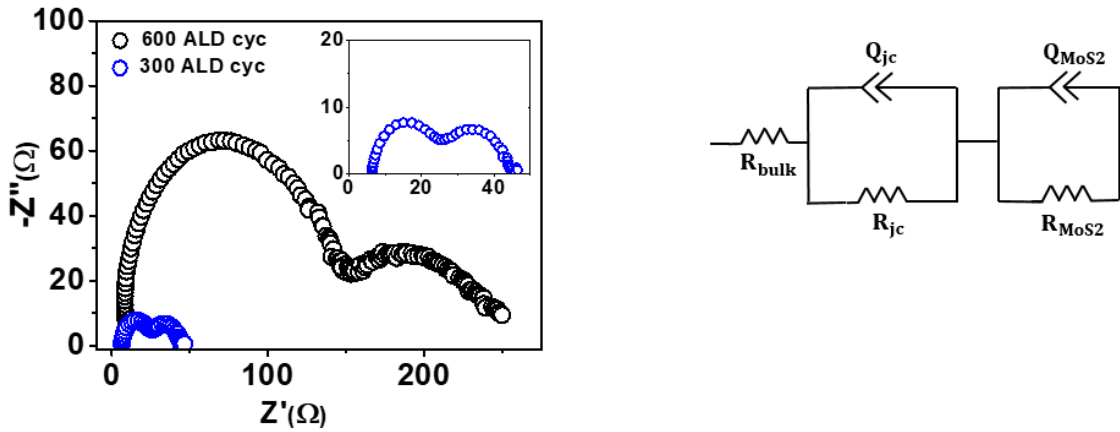

**Figure S2.** (a) Nyquist plot of 700–ALD-cycles and 300-ALD-cycles on *p*-Si photocathode under 1sun illumination at 0 bias. (b) Equivalent circuit corresponding to the EIS measurement.  $R_{\text{bulk}}$  is bulk resistance of the silicon,  $Q_{\text{jc}}$  is constant phase element (CPE) of *p*-Si/MoS<sub>2</sub> junction along with junction resistance  $R_{\text{jc}}$ , CPE of MoS<sub>2</sub>/electrolyte interface is denoted as  $Q_{\text{MoS}_2}$  and the resistance of  $R_{\text{MoS}_2}$ .

**Table S1.** Measured charge transfer resistances.

| Condition         | $R_{\text{bulk}}$ ( $\Omega\text{cm}^2$ ) | $R_{\text{jc}}$ ( $\Omega\text{cm}^2$ ) | $R_{\text{MoS}_2}$ ( $\Omega\text{cm}^2$ ) |
|-------------------|-------------------------------------------|-----------------------------------------|--------------------------------------------|
|                   | Back contact/ <i>p</i> -Si                | <i>p</i> -Si/SiOx/MoS <sub>2</sub>      | MoS <sub>2</sub> /electrolyte              |
| <b>Dark (500)</b> | 5.94                                      | 702.5                                   | 9517                                       |
| <b>600</b>        | 5.514                                     | 77.98                                   | 157.4                                      |
| <b>500</b>        | 4.974                                     | 27.38                                   | 22.38                                      |
| <b>300</b>        | 4.642                                     | 22.26                                   | 16.95                                      |
| <b>100</b>        | 4.108                                     | 83.11                                   | 77.1                                       |

## List of symbols with values and Units

|                |                                                                                               |                                       |
|----------------|-----------------------------------------------------------------------------------------------|---------------------------------------|
| $N_a$          | Acceptor density                                                                              | $1.6 \times 10^{15} \text{cm}^{-3}$   |
| $N_d$          | Donor density                                                                                 | $10^{19} \text{cm}^{-3}$              |
| $n_{i\_Si}$    | Intrinsic carrier density of p-silicon                                                        | $10^{10} \text{cm}^{-3}$              |
| $n_{i\_MoS_2}$ | Intrinsic carrier density of MoS <sub>2</sub>                                                 | $10^{13} \text{cm}^{-3}$              |
| $n_0$          | Electron concentration in p-Si at dark equilibrium                                            | $66,000 \text{cm}^{-3}$               |
| $p_0$          | Hole concentration in n-MoS <sub>2</sub> at dark equilibrium                                  | $10^{13} \text{cm}^{-3}$              |
| $n_s^0$        | Surface electron concentration across the electrode/electrolyte interface at light            | $\text{cm}^{-3}$                      |
| $n_s$          | Surface electron concentration across the Electrode/electrolyte interface at dark equilibrium | $\text{cm}^{-3}$                      |
| $W$            | Depletion width                                                                               | cm                                    |
| $\chi_p$       | Electron negativity of p-Si                                                                   | eV                                    |
| $\chi_n$       | Electron negativity of MoS <sub>2</sub>                                                       | eV                                    |
| $x_p$          | Interface to p-Si depletion width                                                             | cm                                    |
| $x_n$          | Interface to n-MoS <sub>2</sub> depletion width                                               | cm                                    |
| $L_n$          | Minority carrier diffusion length in p-Si                                                     | cm                                    |
| $L_p$          | Minority carrier diffusion length in MoS <sub>2</sub>                                         | cm                                    |
| $N_c$          | Density of states in the conduction band                                                      | $\text{cm}^{-3}$                      |
| $N_v$          | Density of states in the valence band                                                         | $\text{cm}^{-3}$                      |
| $k$            | Boltzmann's constant                                                                          | $1.38 \times 10^{-23} \text{JK}^{-1}$ |
| $q$            | Charge of an electron                                                                         | $1.6 \times 10^{-19} \text{C}$        |
| $\epsilon_r$   | Relative permittivity                                                                         | $\text{Fm}^{-1}$                      |
| $\epsilon_0$   | Vacuum permittivity                                                                           | $\text{Fm}^{-1}$                      |
| $V_{ph}$       | Photovoltage                                                                                  | V                                     |
| $V_{on}$       | On-Set voltage                                                                                | V                                     |
| $V_{bi}$       | Built-in potential                                                                            | V                                     |
| $V_{fb}$       | Flatband potential                                                                            | V                                     |

|          |                                         |                                |
|----------|-----------------------------------------|--------------------------------|
| $V_A$    | Applied voltage                         | V                              |
| $V_0$    | The maximum restriction of photovoltage | V                              |
| $V_o$    | band bending of silicon                 | V                              |
| $\phi_B$ | Barrier height                          | eV                             |
| $\phi_w$ | Work function                           | eV                             |
| $J_{ph}$ | Saturated photocurrent density          | $\text{mA}\cdot\text{cm}^{-2}$ |
| $J_{sc}$ | Photocurrent density at 0 V vs RHE      | $\text{mA}\cdot\text{cm}^{-2}$ |
| T        | Temperature                             | T                              |
| C        | Capacitance                             | $\text{Fcm}^{-2}$              |
| $R_s$    | Series resistance                       | $\Omega\text{cm}^2$            |
| $F_p$    | Quasi-Fermi level in p-Si               | eV                             |
| $F_n$    | Quasi-Fermi level in n-MoS <sub>2</sub> | eV                             |
| $g_{op}$ | Optical generation rate                 | $\text{cm}^{-3}\text{s}^{-1}$  |
